# Supplementary material for: Digital twin-enabled AI for sustainable traffic management: real-time urban mobility optimization in smart cities
Source: PeerJ journal article supplement (doi:10.7717/peerj-cs.3574), 2026-01-26
Supplement: Supplementary_Table_S1.docx [file Supplementary_Table_S1.docx]

**Supplementary Table S1. Sensitivity Analysis of Hidden Units in GRU Model**

| Hidden Units | MAE | RMSE | Inference Latency (ms) |
| --- | --- | --- | --- |
| 32 | 4.9 | 8.3 | 11 |
| 64 | **4.5** | **7.8** | **14** |
| 128 | 4.4 | 7.6 | 24 |
