# Supplementary material for: Digital twin-enabled AI for sustainable traffic management: real-time urban mobility optimization in smart cities
Source: PeerJ journal article supplement (doi:10.7717/peerj-cs.3574), 2026-01-26
Supplement: Supplementary_Table_S2.docx [file Supplementary_Table_S2.docx]

**Supplementary Table S2. Training and inference time comparison**

| Model | Training time | Convergence epoch | Inference latency |
| --- | --- | --- | --- |
| Proposed GRU-DT | 38 min | ~95 | 14 ms |
| Soft-GRU [3] | 61 min | ~130 | 22 ms |
| Federated LSTM [23] | 74 min | ~140 | 38 ms |
| CNN-LSTM [4] | 89 min | ~160 | 45 ms |
